# Supplementary material
Source: publisher figshare collection journal article supplement (https://acs.figshare.com/ndownloader/files/3937711)
Supplement: Supplementary file 1 [file 3937711]

## Supporting Information for manuscript entitled

### *A New Strategy to Enhance Phosphate Removal from Water by Hydrous Manganese Oxide*

Bingcai Pan\*, Feichao Han, Guangze Nie, Bing Wu, Kai He, Lv Lu

State Key Laboratory of Pollution Control and Resource Reuse, School of the  
Environment, Nanjing University, Nanjing 210023, PR China

The *Supporting Information Available* contains 14 pages, including  
Scheme S1, Figures S1-S7, and Tables S1-S4.

**Scheme S1** The historic relationship between three polymeric hosts.

**Figure S1** The particle size distribution nano-HMO inside NS with the aid of Nano  
Measure (Version 1.2, ZKBC)

**Figure S2** XPS spectra of manganese species in HMO@NS and HMO.

**Figure S3** Zeta potentials of HMO and HMO@NS at different pH values.

**Figure S4** Potentiometric titration curves of CS and NS as compared to water

**Figure S5** TEM images of three polymer-based HMO nanocomposite and the bulky  
one. (a) HMO@NS; (b) HMO@SS; (c) HMO@CS; (d) HMO.

**Figure S6** Phosphate adsorption kinetics by NS and HMO@NS at 298 K and pH 7.0.  
Each adsorbent dose was 0.5 g/L. Initial phosphate was 10 mg P/L.

**Figure S7** Adsorption isotherms of HMO@NS and NS at 298 K, pH 7.0. Each  
adsorbent dose was 0.5 g/L.

**Table S1** The intraparticle diffusion model parameters for phosphate adsorption on  
HMO@NS and NS.

**Table S2** Langmuir and Freundlich model parameters for phosphate adsorption on  
HMO@NS and NS

**Table S3** Comparison of adsorption capacity of different phosphate adsorbents

**Table S4** Basic properties of the real effluent from a WWTP in Nanjing city

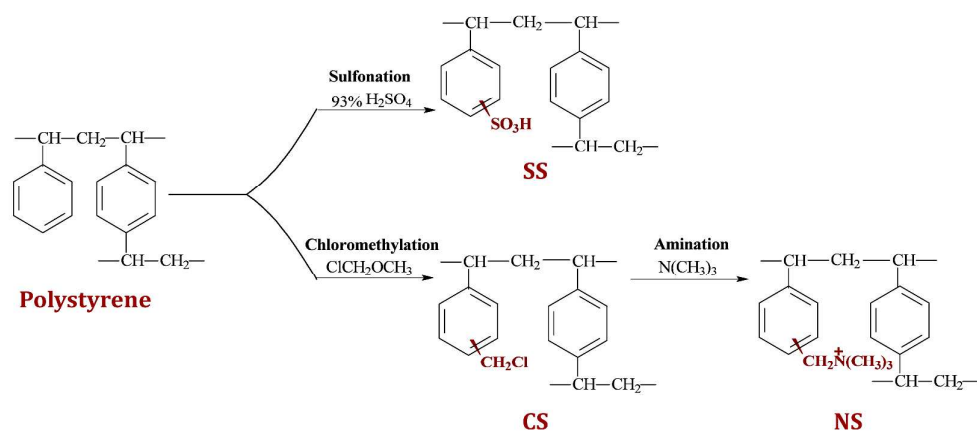

**Scheme S1** The historic relationship between three polymeric hosts

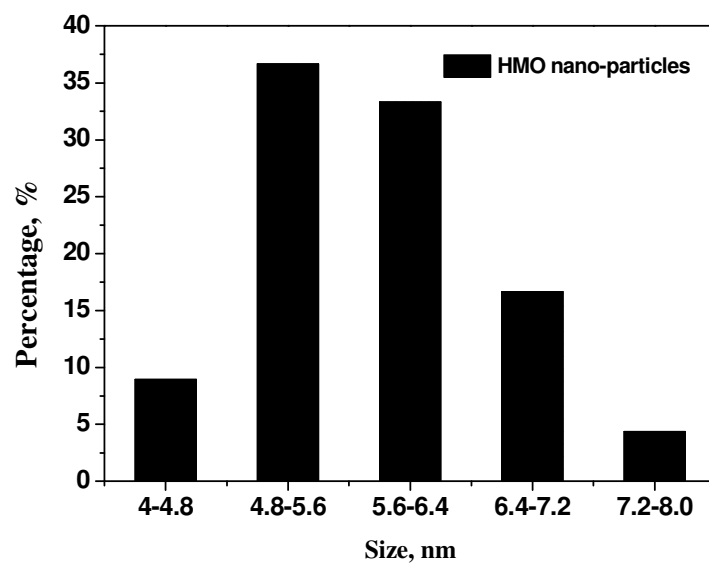

**Figure S1** Particle size distribution of nano-HMO inside NS with the aid of Nano Measure (Version 1.2, ZKBC)

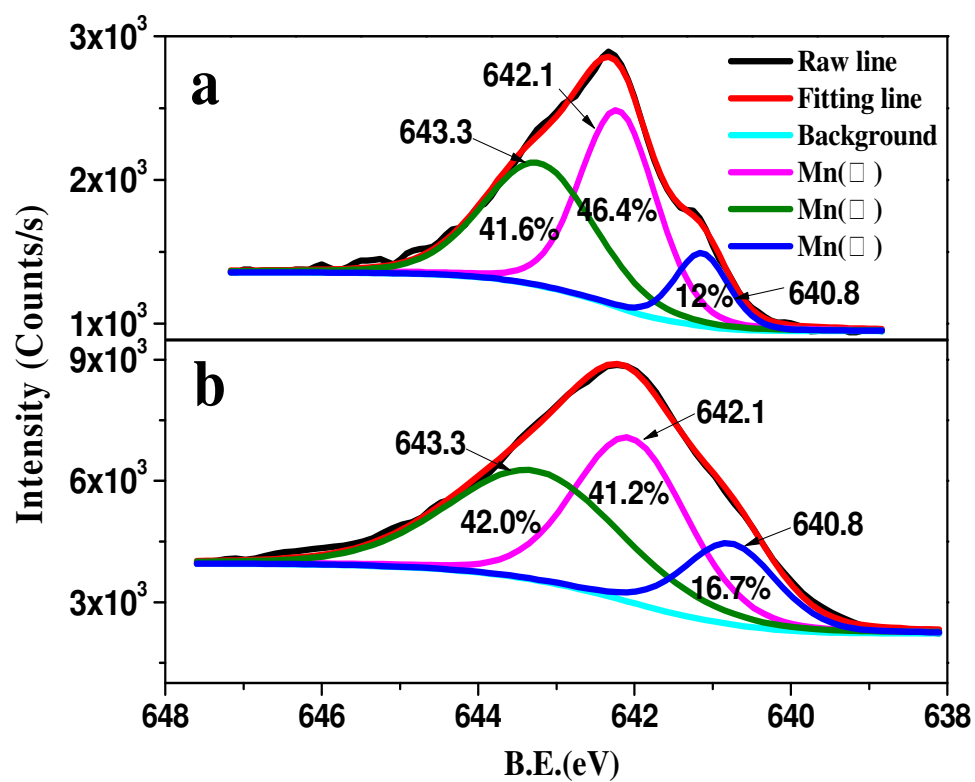

**Figure S2** XPS spectra of manganese species in HMO@NS and HMO (a) HMO@NS; (b) HMO

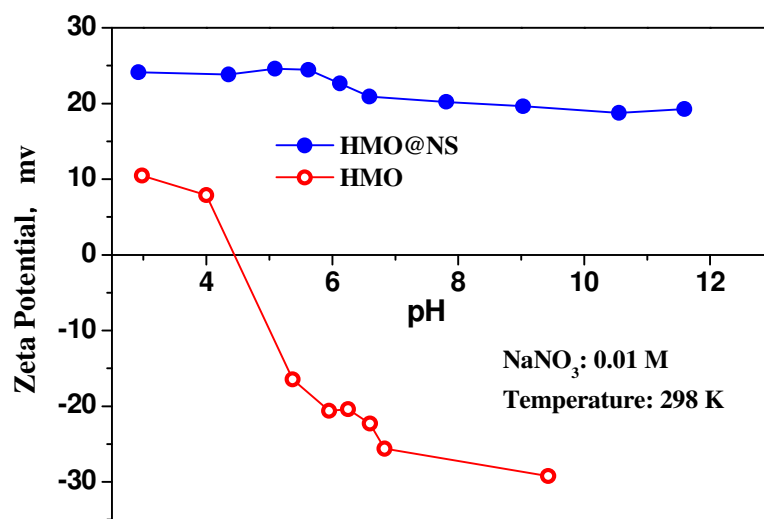

**Figure S3** Zeta potentials of HMO and HMO@NS at different pH values.

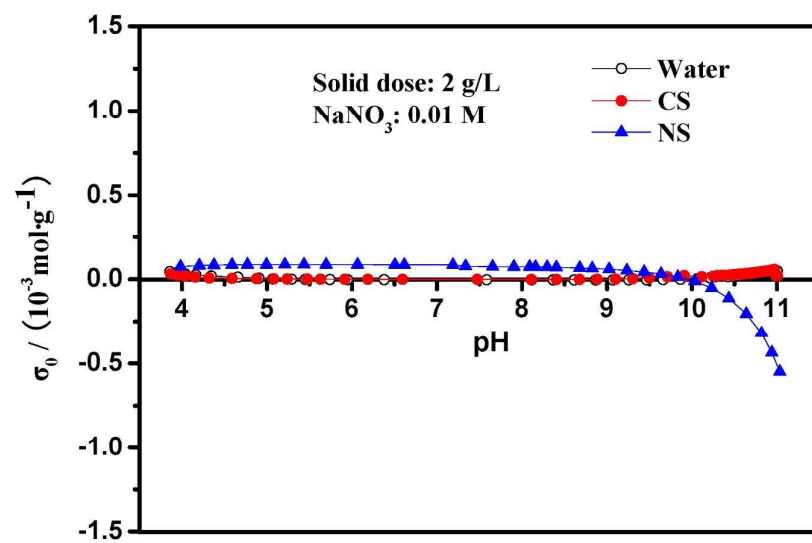

**Figure S4** Potentiometric titration curves of CS and NS as compared to water

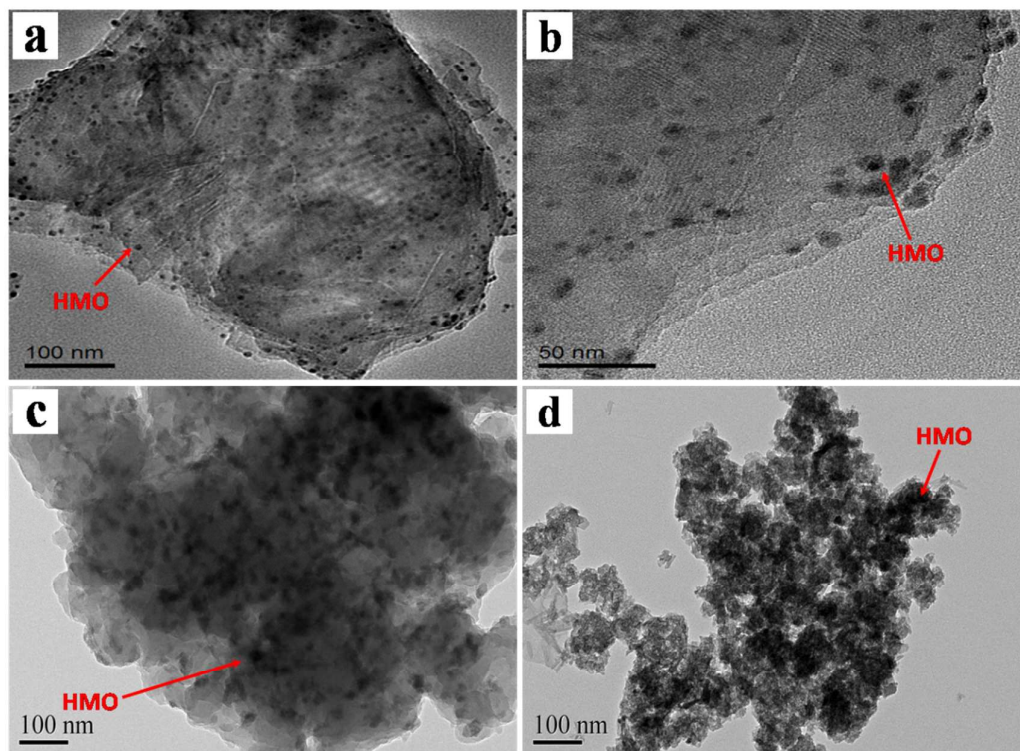

**Figure S5** TEM images of three polymer-based HMO nanocomposites and the bulky one. (a) HMO@NS; (b) HMO@SS; (c) HMO@CS; (d) HMO

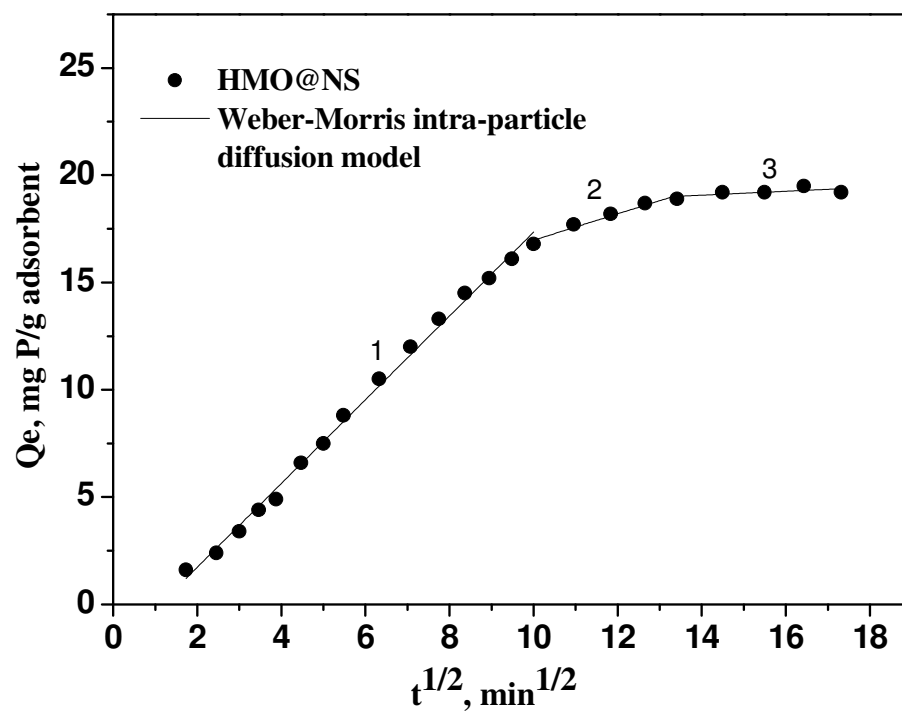

**Figure S6** Phosphate adsorption kinetics from the background by HMO@NS at 298 K and pH 7.0. Adsorbent dose was 0.5 g/L. Initial phosphate was 10 mg P/L.



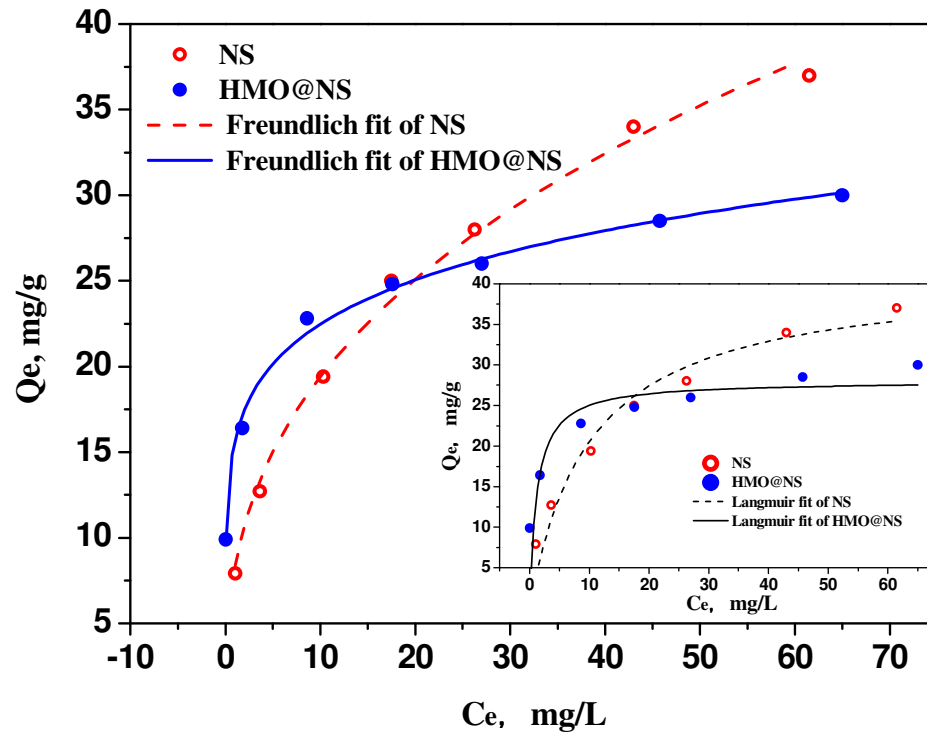

**Figure S7** Adsorption isotherms of HMO@NS and NS at 298 K, pH 7.0. Each adsorbent dose was 0.50 g/L.

**Table S1**

The intraparticle diffusion model parameters for phosphate adsorption on HMO@NS and NS

| Adsorbent | Intraparticle diffusion model |     |       |          |      |       |
|-----------|-------------------------------|-----|-------|----------|------|-------|
|           | $K_{p1}$                      | $I$ | $R^2$ | $K_{p2}$ | $I$  | $R^2$ |
| HMO@NS    | 1.64                          | 0   | 0.993 | 0.502    | 12.2 | 0.966 |
| NS        | 1.26                          | 0   | 0.991 |          |      |       |

$K_{p1}$ : Intraparticle diffusion rate constant of the first step for HMO@NS or NS;

$K_{p2}$ : Intraparticle diffusion rate constant of the second step for HMO@NS;

$I$ :  $Y$ -intercept.

**Table S2**

Langmuir and Freundlich model parameters for phosphate adsorption on NS and HMO@NS.

| Adsorbent | Langmuir model         |                  |       | Freundlich model                         |      |       |
|-----------|------------------------|------------------|-------|------------------------------------------|------|-------|
|           | $q_{max}(\text{mg/g})$ | $b(\text{L/mg})$ | $R^2$ | $K_{[\text{mg/g} \cdot (\text{L/g})^n]}$ | $n$  | $R^2$ |
| NS        | 41.2                   | 0.099            | 0.950 | 8.25                                     | 2.69 | 0.994 |
| HMO@NS    | 28.0                   | 0.833            | 0.644 | 15.66                                    | 6.37 | 0.994 |

**Table S3**

Comparison of adsorption capacity of different phosphate adsorbents

| Adsorbents                     | $q_{\max}$ | References    |
|--------------------------------|------------|---------------|
| Fly ash                        | 20.2       | 1             |
| Blast furnace slag             | 18.9       | 2             |
| CMOMO                          | 26.3       | 3             |
| Ferric sludge                  | 25.5       | 4             |
| Acid mine drainage sludge      | 32.0       | 5             |
| Iron oxide tailings            | 8.2        | 6             |
| Aluminum                       | 23.0       | 7             |
| Fe oxide tailing               | 21.5       | 8             |
| Fe(III)/Cr(III) hydroxide      | 6.5        | 9             |
| Fe-Mn binary oxide adsorbent   | 36         | 10            |
| MgMn-layered double hydroxides | 22.3       | 11            |
| HMO@NS                         | >29.78*    | Present study |

\* Obtained from the Freundlich adsorption isotherm (Figure S7 and Table S2) at the equilibrium concentration of 60 mg P/L.

**Table S4**

Basic properties of the real effluent sampled from a WWTP in Nanjing city.

| pH  | Phosphate<br>(mg P/L) | Cl <sup>-</sup><br>(mg/L) | SO <sub>4</sub> <sup>2-</sup><br>(mg/L) | NO <sub>3</sub> <sup>-</sup><br>(mg/L) | Mg <sup>2+</sup><br>(mg/L) | Ca <sup>2+</sup><br>(mg/L) | NH <sub>4</sub> <sup>+</sup> -N<br>(mg/L) | COD<br>(mg/L) |
|-----|-----------------------|---------------------------|-----------------------------------------|----------------------------------------|----------------------------|----------------------------|-------------------------------------------|---------------|
| 7.2 | 1.3                   | 71.3                      | 47.5                                    | 26.4                                   | 11.3                       | 67.6                       | 0.5                                       | 18.7          |

## Literature cited

1. Chen, J.; Kong, H.; Wu, D.; Chen, X.; Zhang, D.; Sun, Z., Phosphate immobilization from aqueous solution by fly ashes in relation to their composition. *J. Hazard. Mater.* 2007, 139 (2), 293-300.
2. Kostura, B.; Kulveitova, H.; Leško, J., Blast furnace slags as sorbents of phosphate from water solutions. *Water Res.* 2005, 39 (9), 1795-1802.
3. Liu, T.; Wu, K.; Zeng, L., Removal of phosphorus by a composite metal oxide adsorbent derived from manganese ore tailings. *J. Hazard. Mater.* 2012, 217, 29-35.
4. Song, X.; Pan, Y.; Wu, Q.; Cheng, Z.; Ma, W., Phosphate removal from aqueous solutions by adsorption using ferric sludge. *Desalination.* 2011, 280 (1), 384-390.
5. Wei, X.; Viadero Jr., R. C.; Bhojappa, S. Phosphorus removal by acid mine drainage sludge from secondary effluents of municipal wastewater treatment plants, *Water Res.* 2008, 42 (13) , 3275-3284.
6. L. Zeng, X. Li, J. Liu, Adsorptive removal of phosphate from aqueous solutions using iron oxide tailings, *Water Res.* 2004, 38, (5), 1318–1326.
7. Babatunde, A. O.; Zhao, Y.; Burke, A. M.; Morris, M. A.; Hanrahan, J. P. Characterization of aluminium-based water treatment residual for potential phosphorus removal in engineered wetlands, *Environ. Pollut.* 2009, 157, 2830-2836.
8. Zeng, L.; Li, X.; Liu, J. Adsorptive removal of phosphate from aqueous solutions using iron oxide tailings. *Water Res.* 2004, 38(5), 1318-1326.
9. Namasivayam, C.; Prathap, K., Recycling Fe(III)/Cr(III) hydroxide, an industrial solid waste for the removal of phosphate from water. *J. Hazard. Mater.* 2005, 123 (1-3), 127–134.
10. Zhang, G.; Liu, H.; Liu, R.; Qu, J., Removal of phosphate from water by a Fe-Mn binary oxide adsorbent. *J. Colloid Interface Sci.* 2009, 335 (2), 168-174.
11. Chitrakar, R.; Tezuka, S.; Sonoda, A.; Sakane, K.; Ooi, K.; Hirotsu, T., Adsorption of phosphate from seawater on calcined MgMn-layered double hydroxides. *J. Colloid Interface Sci.* 2005, 290(1), 45-51.
